# Metformin partially reverses the carboplatin-resistance in NSCLC by inhibiting glucose metabolism

Yong Liu<sup>1</sup>, Chunxi He<sup>1</sup> and Xianping Huang<sup>1</sup>

<sup>1</sup>Department of Cardiothoracic Surgery, The Second Affiliated Hospital and Yuying Children's Hospital of Wenzhou Medical University, Wenzhou, Zhejiang, 325027, China

Correspondence to: Xianping Huang, email: wzxph1980@sina.com

Keywords: NSCLC, carboplatin resistance, metformin, PKM2, glucose metabolism

Received: March 21, 2017

Accepted: July 12, 2017

Published: September 06, 2017

Copyright: Liu et al. This is an open-access article distributed under the terms of the Creative Commons Attribution License 3.0 (CC BY 3.0), which permits unrestricted use, distribution, and reproduction in any medium, provided the original author and source are credited.

## ABSTRACT

Platinum-based chemotherapeutic drugs are irreplaceable for the treatment of advanced non-small cell lung cancer (NSCLC). However, acquired drug resistance has become a major obstacle for the clinical application of chemotherapy on NSCLC. In the present study, we established carboplatin-resistant NSCLC models on A549 and PC9 cell lines, which were named A549/R and PC9/R. Besides the low sensitivity of A549/R and PC9/R to carboplatin treatment, they exhibited higher metabolism rate of glucose compared to their parental A549 and PC9 cells, respectively. Mechanically, we confirmed that overexpression of PKM2 in A549/R and PC9/R was responsible for the high glucose metabolism and carboplatin resistance. Metformin, an antidiabetic drug, was observed to increase the sensitivity of carboplatin-resistant NSCLC cells to carboplatin treatment *in vitro* and *in vivo*. Mechanically, metformin decreased expression of PKM2 and subsequently inhibited the glucose uptake, lactate generation and ATP production in A549/R and PC9/R. Therefore, metformin promoted carboplatin-induced apoptosis through the mitochondria pathway. In addition, we demonstrated that metformin treatment also impaired the cross-resistance of A549/R and PC9/R to cisplatin, etoposide and 5-fluorouracil.

## INTRODUCTION

Due to the high potential of metastasis and low sensitivity to chemotherapy and/or radiation therapy, non-small cell lung cancer (NSCLC) is the leading cause of cancer-related deaths worldwide [1, 2]. For NSCLC patients without mutation of epidermal growth factor receptor (EGFR), chemotherapy is an irreplaceable treatment [3, 4]. Unfortunately, repeated use of chemotherapeutic drugs usually induces multiple drug resistance in cancers, especially in NSCLC [5]. It is urgent to explore and reveal the mechanisms by which chemoresistance occurs in NSCLC.

Platinum-based chemotherapy is considered as the first-line treatment for patients with advanced NSCLC. Carboplatin or cisplatin activates apoptosis signaling pathways of tumor cells by formatting inter- and

intrastrand cross-links with DNA [6, 7]. However, due to the repeated use of platinum-based chemotherapeutic drugs, NSCLC cells develop strategies to resist apoptosis pathways [8]. Thus, adjuvant therapies are regarded as indispensable treatments to reverse or delay the occurrence of drug-resistance.

Metformin (1,1-dimethylbiguanide hydrochloride) is a well-known oral medicine for treatment of type-II diabetes. Recent research demonstrates that the use of metformin in patients with diabetes may reduce the occurrence of cancers [9]. Furthermore, metformin treatment is reported to prevent lung adenoma formation and induce growth inhibition and cell cycle arrest in renal cancer cells [10, 11]. For adjuvant therapy of cancer, studies have indicated that metformin may reverse the resistance of breast cancer cells to doxorubicin by reducing the drug efflux [12]. Combination with metformin promotes sorafenib to suppress the proliferation and

induce autophagy of hepatocellular carcinoma cells [13]. In lung cancer, metformin was found to reverse resistance to tyrosine kinase inhibitors and ALK inhibitors [14, 15]. It is indeed that metformin acts as a potential anti-cancer drug. The aim of this study is to investigate the role of metformin in reversing the carboplatin-resistance in NSCLC and explore the underlying mechanisms.

## RESULTS

### Overexpression of PKM2 is associated with carboplatin-resistance in NSCLC cells

To study the chemoresistance in NSCLC, we established carboplatin-resistant NSCLC models on A549 and PC9 cell lines. As shown in Figure 1A, A549/R and PC9/R cells exhibited significant resistance to carboplatin compared to the corresponding A549 and PC9 cells, respectively. Interestingly, results of qRT-PCR showed that the expression of PKM2 was obviously overexpressed when the A549 and PC9 NSCLC cells became resistant to carboplatin (Figure 1B and 1C). It

suggested that overexpression of PKM2 was associated with carboplatin-resistance in A549/R and PC9/R. To confirm this speculation, we transfected these A549/R and PC9/R cells with PKM2 siRNA. After transfection, expression of PKM2 was knockeddown by its specific siRNA (Figure 1D). We then observed that knockdown of PKM2 significantly resensitized the A549/R and PC9/R to carboplatin treatment (Figure 1E). In addition, we transfected the routine A549 and PC9 cells with PKM2 plasmid (Figure 1F) before MTT assays. The results showed that enforced expression of PKM2 significantly reduced the sensitivity of routine A549 and PC9 cells to carboplatin treatment (Figure 1G). Taken together, we demonstrated that high level of PKM2 induced resistance to carboplatin in NSCLC.

### Metformin treatment decreases the expression of PKM2 in carboplatin-resistant NSCLC cells

We first tested the cytotoxicity of metformin to carboplatin-resistant NSCLC cells. As shown in Figure 2A, cytotoxicity of metformin to A549/R and PC9/R was

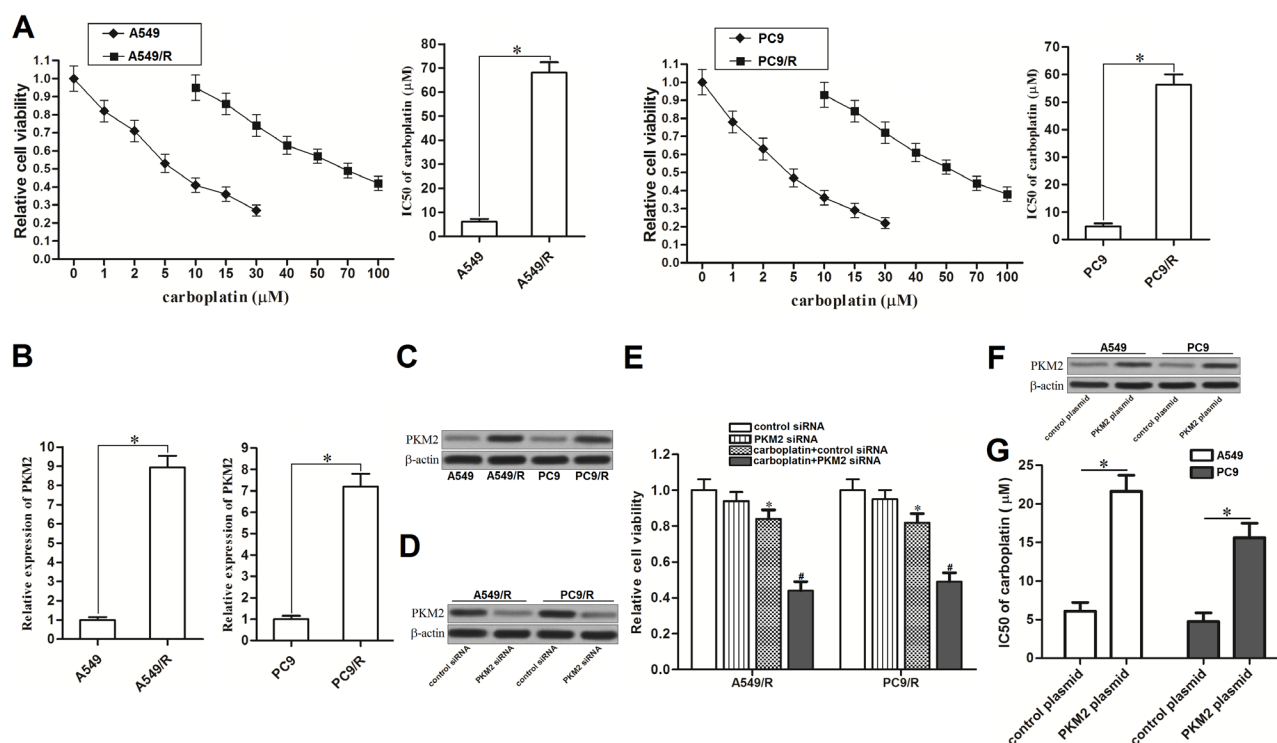

**Figure 1: Overexpression of PKM2 induced resistance to carboplatin in NSCLC.** (A) After treatment with different concentrations of carboplatin for 48 h, cell viability of A549, A549/R, PC9 and PC9/R was measured by MTT assays. IC<sub>50</sub> of carboplatin was determined according to the cell viability curve. \**P*<0.05. (B) qRT-PCR analysis was performed to detect the relative expression of PKM2 at mRNA level in A549, A549/R, PC9 and PC9/R. \**P*<0.05. (C) Western blot analysis was performed to detect the expression of PKM2 at protein level in A549, A549/R, PC9 and PC9/R. (D) After transfection with PKM2 siRNA (50 pmol/ml) for 24 h, expression of PKM2 in A549/R and PC9/R was measured by western blot analysis. (E) After transfection with PKM2 siRNA (50 pmol/ml) for 24 h, A549/R and PC9/R cells were treated with carboplatin (20 μM) for additional 48 h. Relative cell viability of them was detected by MTT assays. \**P*<0.05 vs. control siRNA group. #*P*<0.05 vs. carboplatin + control siRNA group. (F) After transfection with PKM2 plasmid (2 μg/ml) for 24 h, expression of PKM2 in A549 and PC9 was measured by western blot analysis. (G) IC<sub>50</sub> of carboplatin to A549 and PC9 was determined according to the cell viability curve. \**P*<0.05.

slight, even if the concentration of it was very high. We therefore chose a relative low concentration of metformin (2 mM) for co-treatment with carboplatin. Interestingly, we found that metformin (2 mM) but not the carboplatin (20  $\mu$ M) decreased the expression of PKM2 in A549/R and PC9/R cells at mRNA level (Figure 2B) and protein level (Figure 2C). It suggested that metformin may play the subsidiary role in carboplatin-base chemotherapy by targeting PKM2. In addition, we observed that transfection with PKM2 plasmid significantly abolished the effect of metformin on decreasing the expression of PKM2.

### Metformin hampered the glucose metabolism of carboplatin-resistant NSCLC cells

Recent research suggested that high rate of glucose metabolism facilitated cancer cells' survival and contributed to chemoresistance [16]. In our study, we

observed that glucose uptake was significantly increased when the NSCLC cells became carboplatin-resistance (Figure 3A). Furthermore, A549/R and PC9/R cells produced more amount of lactate and ATP compared with the A549 and PC9 cells, respectively (Figure 3B and 3C). Thus, we indicated that carboplatin-resistant NSCLC cells exhibited higher rate of glucose metabolism compared to their corresponding routine NSCLC cells. In addition, transfection with PKM2 plasmid into routine A549 and PC9 cells significantly increased the glucose uptake (Figure 3D), lactate generation (Figure 3E) and ATP production (Figure 3F). These results indicated that overexpression of PKM2 induced high rate of glucose metabolism in NSCLC. We next investigated the effect of metformin on carboplatin-resistance of NSCLC. After treatment with metformin and carboplatin in A549/R and PC9/R cells, we found that metformin but not the carboplatin significantly decreased glucose uptake and

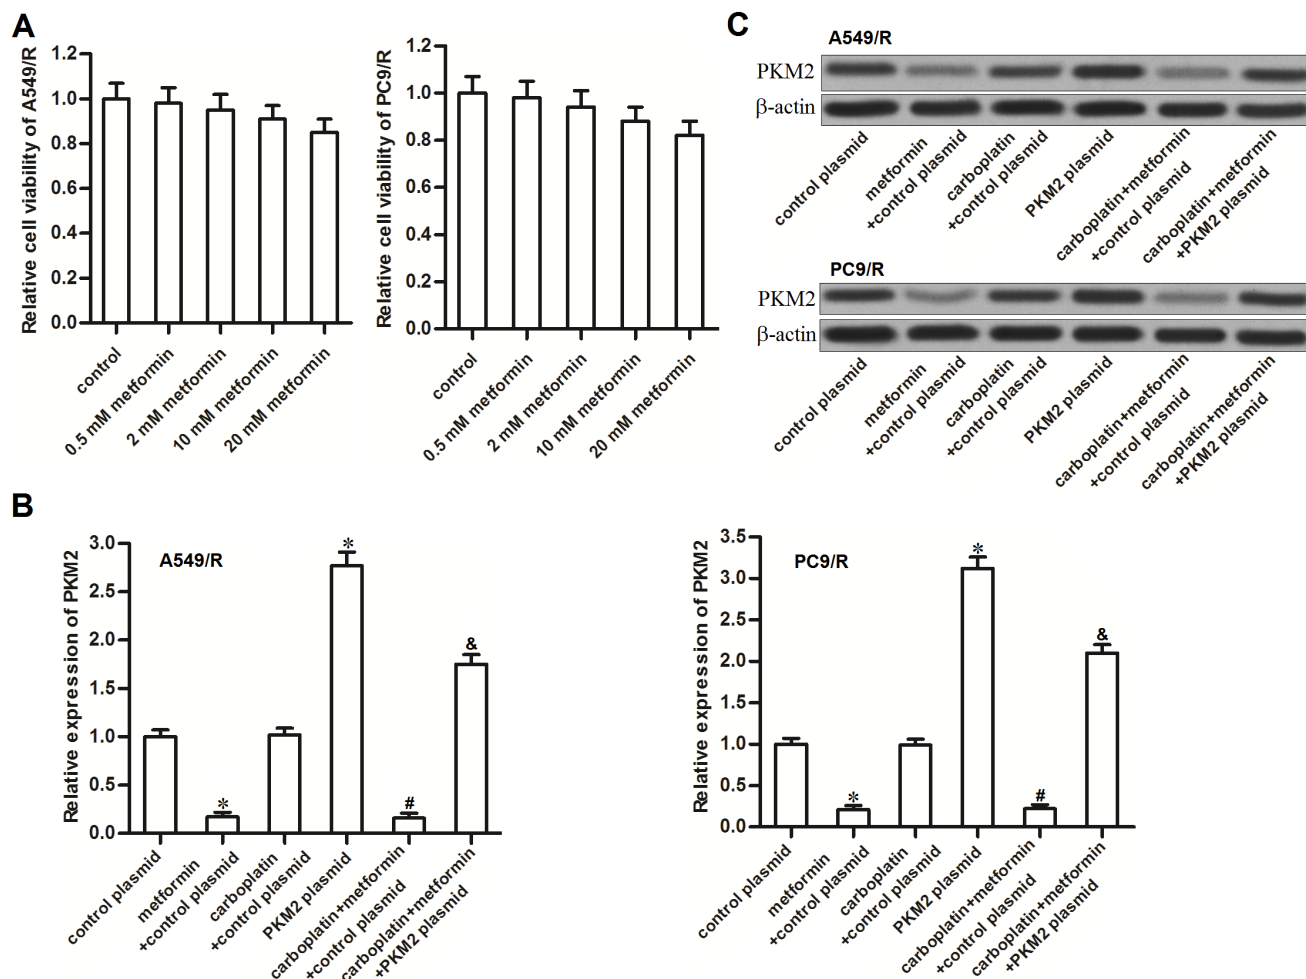

**Figure 2: Metformin decreased the expression of PKM2 in A549/R and PC9/R.** (A) A549/R and PC9/R cells were treated with different concentrations of metformin. MTT assay was performed to detect the cell viability. (B) After treatment with metformin (2 mM), carboplatin (20  $\mu$ M) and PKM2 plasmid (2  $\mu$ g/ml), qRT-PCR analysis was performed to detect the relative expression of PKM2 at mRNA level in A549/R and PC9/R. \* $P$ <0.05 vs. control plasmid group. # $P$ <0.05 vs. carboplatin + control plasmid group. & $P$ <0.05 vs. carboplatin + metformin + control plasmid group. (C) Western blot analysis was performed to detect the expression of PKM2 at protein level in A549/R and PC9/R.

lactate production in both of these cells (Figure 3G and 3H). As the results, metformin strongly reduced the production of ATP in A549/R and PC9/R (Figure 3I). In addition, transfection with PKM2 plasmid significantly abolished the effect of metformin on reducing the glucose uptake, lactate production and ATP production. We therefore demonstrated that metformin hampered the glucose metabolism of carboplatin-resistant NSCLC cells by decreasing the expression of PKM2.

### Metformin sensitizes carboplatin-resistant NSCLC cells to carboplatin by decreasing the expression of PKM2 *in vitro*

Results of MTT assays showed that metformin treatment significantly enhanced the carboplatin-induced cell death in A549/R (Figure 4A) and PC9/R (Figure 4B). We observed obvious decrease of carboplatin IC50 to A549/R and PC9/R mediated by metformin adjuvant

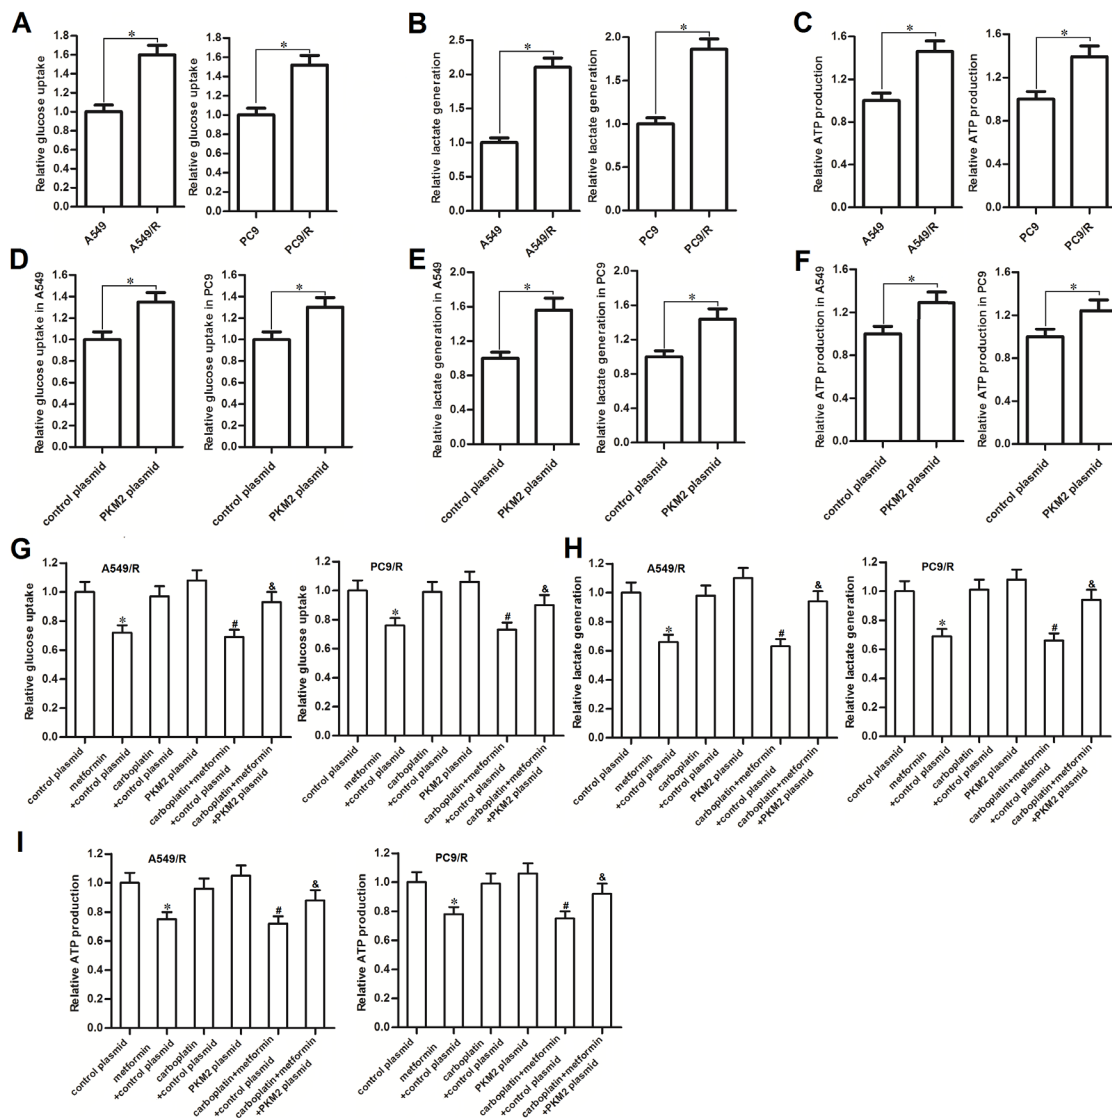

**Figure 3: Metformin hampered the glucose metabolism of carboplatin-resistant NSCLC cells.** (A) Relative glucose uptake in A549, A549/R, PC9 and PC9/R cells. \* $P < 0.05$ . (B) Relative lactate production in A549, A549/R, PC9 and PC9/R cells. \* $P < 0.05$ . (C) Relative ATP production in A549, A549/R, PC9 and PC9/R cells. \* $P < 0.05$ . (D) Relative glucose uptake in PKM2 plasmid (or control plasmid) transfected A549 and PC9 cells. \* $P < 0.05$ . (E) Relative lactate production in PKM2 plasmid (or control plasmid) transfected A549 and PC9 cells. \* $P < 0.05$ . (F) Relative ATP production in PKM2 plasmid (or control plasmid) transfected A549 and PC9 cells. \* $P < 0.05$ . (G) Effect of metformin (2 mM), carboplatin (20  $\mu$ M) and PKM2 plasmid (2  $\mu$ g/ml) on changing the glucose uptake in A549/R and PC9/R cells. \* $P < 0.05$  vs. control plasmid group. # $P < 0.05$  vs. carboplatin + control plasmid group. & $P < 0.05$  vs. carboplatin + metformin + control plasmid group. (H) Effect of metformin (2 mM), carboplatin (20  $\mu$ M) and PKM2 plasmid (2  $\mu$ g/ml) on changing the lactate production in A549/R and PC9/R cells. \* $P < 0.05$  vs. control plasmid group. # $P < 0.05$  vs. carboplatin + control plasmid group. & $P < 0.05$  vs. carboplatin + metformin + control plasmid group. (I) Effect of metformin (2 mM), carboplatin (20  $\mu$ M) and PKM2 plasmid (2  $\mu$ g/ml) on changing the ATP production in A549/R and PC9/R cells. \* $P < 0.05$  vs. control plasmid group. # $P < 0.05$  vs. carboplatin + control plasmid group. & $P < 0.05$  vs. carboplatin + metformin + control plasmid group.

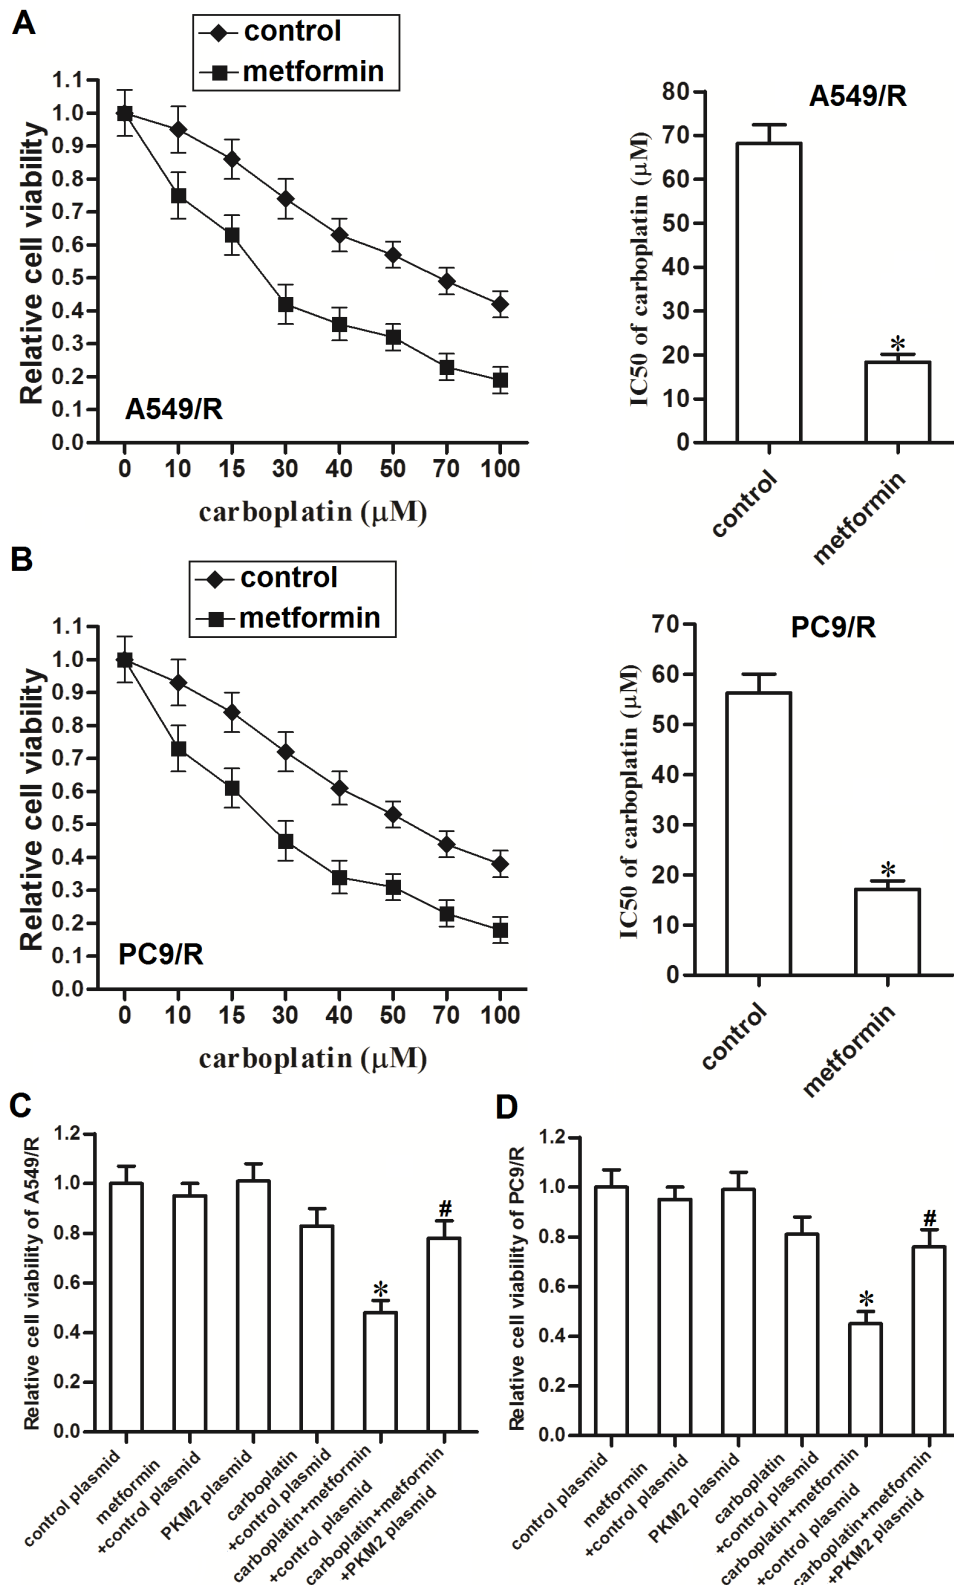

**Figure 4: Metformin sensitizes A549/R and PC9/R cells to carboplatin by decreasing the expression of PKM2.** (A) Metformin (2 mM) enhanced carboplatin-induced cell death in A549/R. \* $P < 0.05$  vs. control group. (B) Metformin (2 mM) enhanced carboplatin-induced cell death in PC9/R. \* $P < 0.05$  vs. control group. (C) PKM2 plasmid (2  $\mu\text{g/ml}$ ) abolished the promotion of metformin on carboplatin-induced (20  $\mu\text{M}$ ) cell death in A549/R. \* $P < 0.05$  vs. carboplatin + control plasmid group. # $P < 0.05$  vs. carboplatin + metformin + control plasmid group. (D) PKM2 plasmid (2  $\mu\text{g/ml}$ ) abolished the promotion of metformin on carboplatin-induced (20  $\mu\text{M}$ ) cell death in PC9/R. \* $P < 0.05$  vs. carboplatin + control plasmid group. # $P < 0.05$  vs. carboplatin + metformin + control plasmid group.

therapy. However, we found that transfection with PKM2 plasmid significantly abolished the promotion of metformin on killing the A549/R (Figure 4C) and PC9/R (Figure 4D). Thus, we demonstrated that metformin was an effective adjuvant therapeutic drug for carboplatin-based chemotherapy in carboplatin-resistant NSCLC cells.

### Metformin sensitizes carboplatin-resistant NSCLC cells to carboplatin *in vivo*

To investigate the role of metformin in carboplatin-resistance in NSCLC, we established the *in vivo* model of NSCLC by using A549/R cells. We observed that single administration with carboplatin showed weak treatment effect on NSCLC. In contrast, although metformin single treatment didn't reduce the tumor volume obviously, it strongly enhanced the anti-tumor effect of carboplatin on carboplatin-resistant NSCLC model (Figure 5A). After analyzing the expression of PKM2 in NSCLC tumor tissues by using western blot, we found that metformin significant decreased the expression of PKM2 in A549/R tumor model (Figure 5B). These results suggested that metformin can reverse the carboplatin resistance by inhibiting the expression of PKM2.

### Metformin promotes carboplatin-induced apoptosis through the mitochondria pathway in carboplatin-resistant NSCLC cells

Results of flow cytometry analysis showed that metformin significantly enhanced the effect of carboplatin on reducing the mitochondrial membrane potential (MMP) of A549/R and PC9/R (Figure 6A). Due to the damage of mitochondria induced by metformin and carboplatin co-treatment, mitochondria-derived pro-apoptotic inducers such as smac/DIABLO [17] and cytochrome c [18] were released from mitochondria into cytoplasm in A549/R and PC9/R (Figure 6B). As the results, caspase-9 and caspase-3 in A549/R and PC9/R were activated by these

apoptotic inducers (Figure 6C). And finally, apoptosis was occurred in A549/R and PC9/R (Figure 6D). Taken together, these results demonstrated that adjuvant treatment with metformin could reverse the resistance of NSCLC cells to carboplatin-induced apoptosis through the mitochondria pathway.

### Metformin reverses cross-resistance of A549/R and PC9/R to cisplatin, etoposide and 5-fluorouracil

To investigate the role of metformin in multidrug resistance in carboplatin-resistant NSCLC cells, we treated the A549/R and PC9/R cells with metformin combined with cisplatin, etoposide or 5-fluorouracil. The results of MTT showed that metformin co-treatment significantly increased the sensitivity of A549/R and PC9/R cells to cisplatin, etoposide or 5-fluorouracil (Figure 7A). We found that adjuvant therapy with metformin obviously reduced the IC50 of cisplatin, etoposide and 5-fluorouracil to A549/R and PC9/R cells (Figure 7B). We demonstrated that that adjuvant treatment with metformin could reverse the cross-resistance of NSCLC cells.

## DISCUSSION

Carboplatin is one representative platinum-based chemotherapeutic drug. It exhibits effective activity against various solid tumors, especially NSCLC [19, 20]. Survival time of NSCLC patients is usually linked to the degree of clinical response to carboplatin treatment [21, 22]. However, NSCLC patients usually suffered from the drug resistance due to the repeated use of carboplatin [23, 24]. Mechanism by which carboplatin induces cell death of tumors is dependent on the DNA damage which is the strong apoptotic signaling [25, 26]. Thus, the carboplatin-resistance of tumor cells is exhibited as low response to apoptotic signaling caused by carboplatin treatment. In the present study, our established carboplatin-resistant

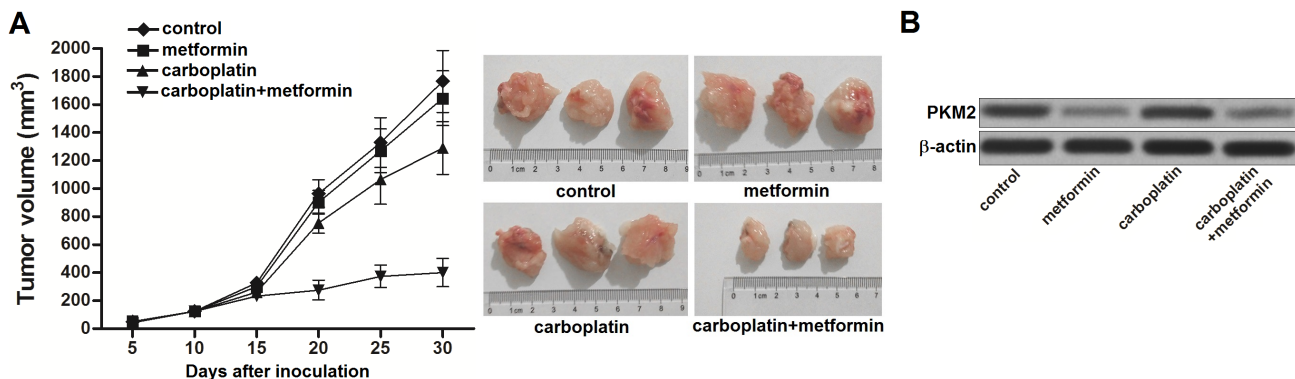

**Figure 5: Metformin sensitizes carboplatin-resistant NSCLC cells to carboplatin *in vivo*.** (A) Anti-tumor effect of carboplatin and metformin on carboplatin-resistant NSCLC model. (B) Western blot assay was performed to analyze the expression of PKM2 at the protein level in carboplatin-resistant NSCLC tumor tissues treated with carboplatin and metformin.

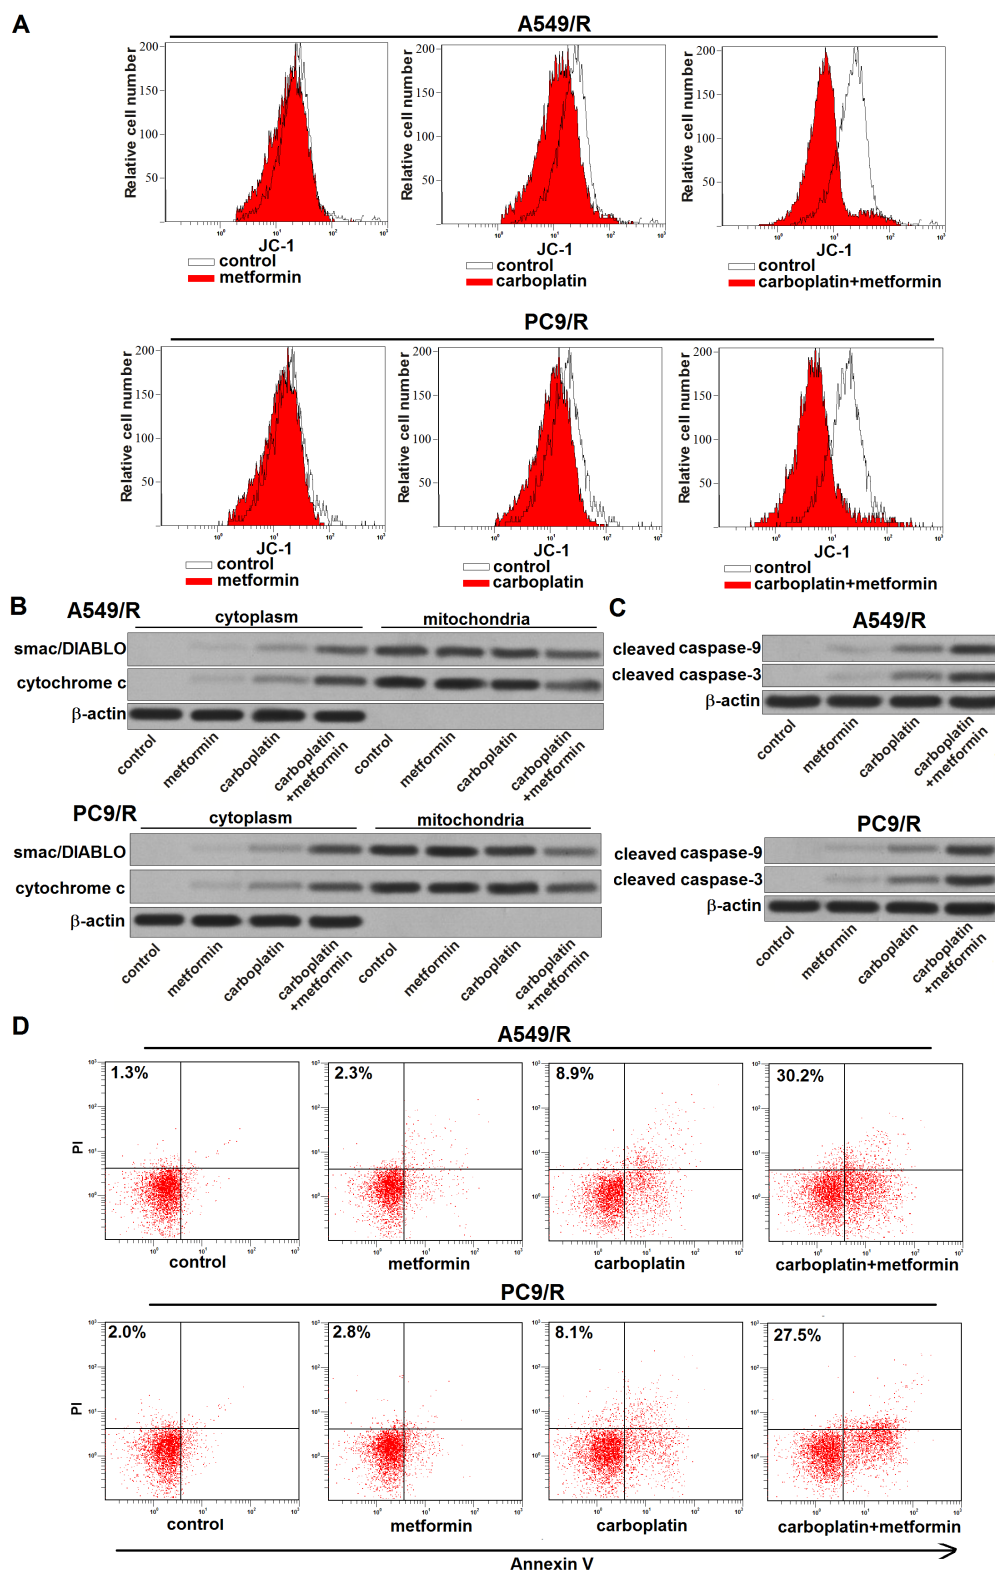

**Figure 6: Metformin promotes carboplatin-induced apoptosis through the mitochondria pathway.** (A) After treatment with metformin (2 mM) and carboplatin (20  $\mu$ M) for 48 h, mitochondrial membrane potential (MMP) of A549/R and PC9/R was detected by JC-1 staining on flow cytometry. (B) After treatment with metformin (2 mM) and carboplatin (20  $\mu$ M) for 48 h, expression of smac/DIABLO and cytochrome c in cytoplasm or mitochondria was detected by western blot analysis. (C) After treatment with metformin (2 mM) and carboplatin (20  $\mu$ M) for 48 h, cleavage of caspase-9 and caspase-3 in A549/R and PC9/R was evaluated by western blot analysis. (D) After treatment with metformin (2 mM) and carboplatin (20  $\mu$ M) for 48 h, apoptotic rate of A549/R and PC9/R was measured by Annexin V and propidium iodide (PI) staining on flow cytometry.

NSCLC cells showed resistance to carboplatin treatment with significant low response to apoptosis pathway. Therefore, increasing sensitivity of carboplatin-resistant NSCLC cells to apoptotic signaling may represent an effective strategy against the chemoresistance.

Pyruvate kinase (PK) is a key enzyme of glycolysis. The Pyruvate kinase isoenzyme M1 (PKM1) is expressed in normal tissues while the PKM2 is strongly overexpressed in cancers. In glucose metabolism process, PKM2 converts phosphoenolpyruvate and ADP to pyruvate and ATP. Cellular pyruvate produces more amount of ATP through oxidative mitochondrial metabolism (OXPHOS). Indeed, the level of glucose metabolism and ATP is dependent on the level of PKM2 in cancer [27, 28]. Moreover, recent studies indicate that overexpression of PKM2 induces chemoresistance [29, 30]. In the present study, we observed significantly higher expression level of PKM2 in carboplatin-resistant NSCLC cells compared to routine NSCLC cells. Furthermore, knockdown of PKM2 in carboplatin-resistant NSCLC cells was found to sensitize these cells to carboplatin treatment. We proved the role of PKM2 in inducing the chemoresistance.

Due to the Warburg effect, cancer cells uptake higher level of glucose and require higher energy supply compare with the normal cells [31, 32]. Previous studies have indicated that cancer cells are sensitive to change of glucose metabolism, particularly the change of intracellular ATP level. It is reported that depletion of glucose metabolism and intracellular ATP induce the depression of drug efflux system, and sensitize cells to apoptosis pathway [33–37]. Thus, high level of glucose metabolism and intracellular ATP facilitate the occurrence of chemoresistance of cancer cells.

Metformin has been reported to inhibit the cell growth and reverse the drug-resistance in some cancers by reducing the production of ATP [38, 39]. In addition, although metformin has been reported to increase chemosensitivity and target PKM2 in routine cancer cells [40, 41], effect of metformin on cancer models with acquired drug resistance is unclear. In the present study, we demonstrated that metformin treatment decreased the expression of PKM2 in carboplatin-resistant NSCLC cells. PKM2 was shown as the target of metformin in these cells. Due to the decrease of PKM2, metformin was found to inhibit the glucose metabolism and reduce

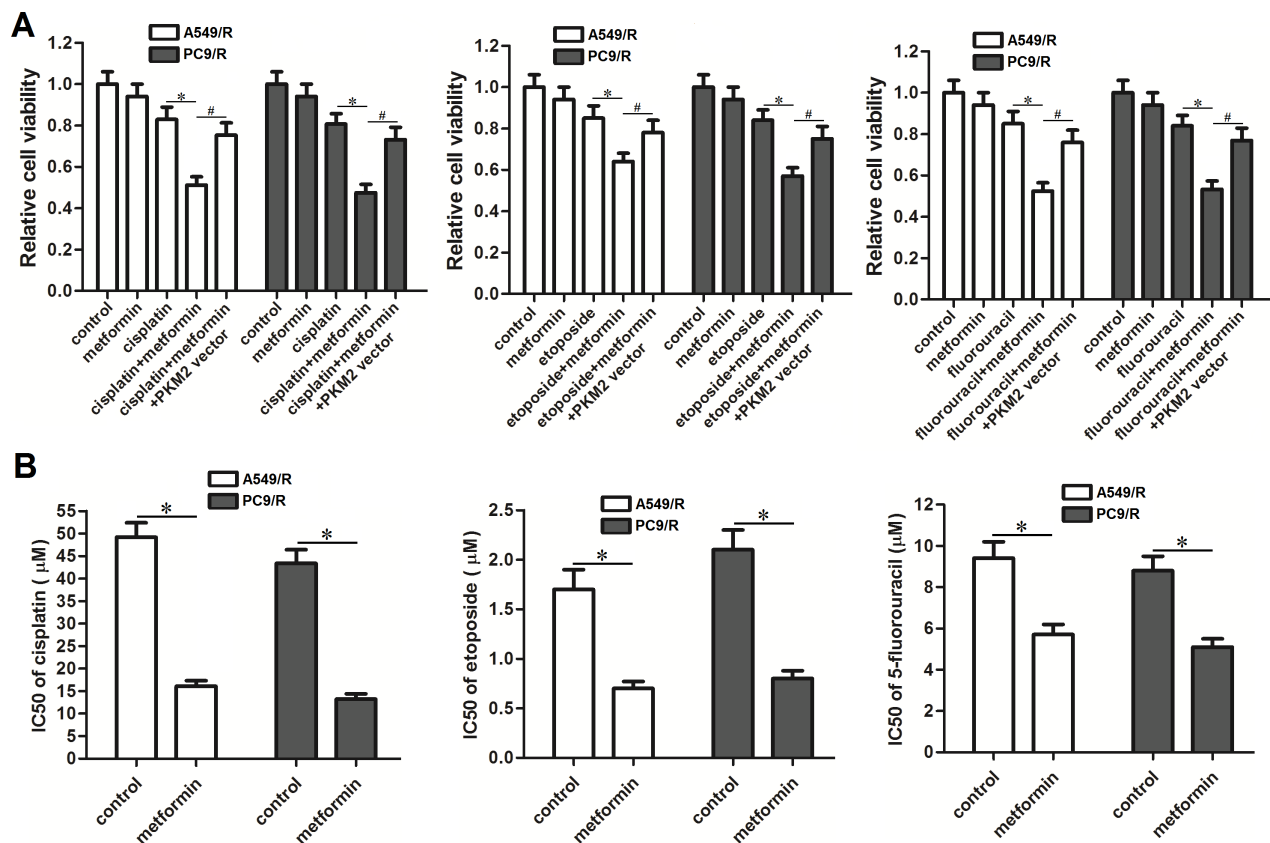

**Figure 7: Effect of metformin on reversing the cross-resistance of A549/R and PC9/R. (A)** A549/R and PC9/R cells were treated with metformin (2 mM), cisplatin (15 μM), etoposide (0.5 μM) and 5-fluorouracil (5 μM) for 48 h. MTT assays were performed to detect the relative cell viability of A549/R and PC9/R cells. \* $P < 0.05$ , # $P < 0.05$ . **(B)** IC50 of cisplatin, etoposide and 5-fluorouracil to A549/R and PC9/R cells was evaluated according to cell viability curve determined by results of MTT assays. \* $P < 0.05$ .



the ATP level in carboplatin-resistant NSCLC cells. As the results, metformin resensitized carboplatin-resistant NSCLC cells to carboplatin-induced apoptosis through the mitochondrial pathway. Generally speaking, these data explore the effect of metformin on reversing the acquired drug resistance of lung cancer. It is possible that high level of ATP and PKM2 making these resistant NSCLC cells more sensitive to metformin.

In conclusion, we provide reliable evidence that metformin treatment can partially reverse the resistance of NSCLC cells to carboplatin-induced apoptosis by inhibiting the glucose metabolism and ATP production. Furthermore, our data also indicated that the cross-resistance of NSCLC cells may be partially reversed by metformin. These findings suggest the value of metformin adjuvant treatment on platinum-based chemotherapy in NSCLC. However, further efforts should be made to explore the effect of metformin on other types of cancer and the biological mechanism by which metformin suppresses the expression of PKM2.

## **MATERIALS AND METHODS**

### **Cell lines**

Human NSCLC cell lines A549 and PC9 were purchased from American Type Culture Collection (ATCC, Rockville, MD, USA). Cells were cultured in DMEM medium supplemented with 10% fetal bovine serum (FBS, Gibco, Invitrogen). To establish the carboplatin-resistant NSCLC models, we exposed the A549 and PC9 cells with gradually increasing concentrations of carboplatin. Briefly, A549 and PC9 cells were initially treated with 1  $\mu$ M carboplatin for 3 months. Then, the carboplatin concentration was increased every 3 weeks by 0.2  $\mu$ M up to a final concentration of 3  $\mu$ M. The established carboplatin-resistant A549 and PC9 cells were named as A549/R and PC9/R, respectively.

### **Gain (loss)-of-function of PKM2**

For overexpression of PKM2, open reading frame of PKM2 gene was amplified by PCR and then linked to pcDNA3.1 eukaryotic expression plasmid (Invitrogen). For knockdown of PKM2, the specific PKM2 small interfering RNA (siRNA) was purchased from Genechem Co., Ltd. (Shanghai, China). To perform the gain (loss)-of-function experiments of PKM2, A549/R and PC9/R cells were transiently transfected with 2  $\mu$ g/ml PKM2 plasmid or 50 pmol/ml PKM2 siRNA using Lipofectamine 2000 (Invitrogen) according to the manufacturer's instructions.

### **Cell viability and IC50**

MTT assay was performed to detect the viability of NSCLC cells. First,  $5 \times 10^3$  NSCLC cells were seeded

on 96-well plates and cultured at 37 °C. After treatment with chemotherapeutic drugs and metformin, cells were treated with MTT for additional 4 h. Cell viability was evaluated according to the absorbance measured at 490 nm by using an ELISA microplate reader (Sunrise Microplate Reader, TECAN, Switzerland). Half maximal inhibitory concentration (IC50) of chemotherapeutic drugs to NSCLC cells was calculated according to the corresponding cell viability curve.

### **Quantitative real-time polymerase chain reaction (qRT-PCR)**

Total RNAs were isolated from A549, PC9, A549/R and PC9/R cells using Trizol<sup>®</sup> reagent (Invitrogen, USA) according to the manufacturer's instructions. Subsequently, cDNA of these cells was reverse transcribed using the M-MLV Reverse Transcriptase (Invitrogen) according to the manufacturer's instructions. QRT-PCR was performed with ABI PRISM 7500 Sequence Detection System (Applied Biosystems, USA) using SYBR Premix Ex Taq (TaKaRa, Japan).  $\beta$ -actin was used as normalization control to determine the relative expression of PKM2.

### **Western blot analysis**

NSCLC cells were lysed in 1  $\times$  SDS loading buffer containing protease inhibitors. Total proteins in cell lysates were then separated by 10% sodium dodecyl sulfate-polyacrylamide gel electrophoresis (SDS-PAGE), and then transferred to polyvinylidene fluoride (PVDF) membranes (Millipore, Billerica, MA, USA). Subsequently, these membranes were incubated with specific antibodies for PKM2, smac/DIABLO, cytochrome c, cleaved caspase-9, cleaved caspase-3 and  $\beta$ -actin (Cell Signaling, USA) overnight. After incubating with appropriate HRP-conjugated secondary antibodies, the protein bands were detected by using an enhanced chemiluminescent substrate (Thermo Fisher Scientific, Inc, USA).

### **Glucose, lactate and ATP assays**

After treatment with carboplatin (20  $\mu$ M) and metformin (2 mM), A549/R and PC9/R cells were collected and washed with PBS for twice. Relative glucose uptake, lactate production and ATP production were detected by using Amplex Red Glucose/Glucose Oxidase assay kit (Molecular Probes, USA), Lactate Assay Kit (BioVision, USA) and ATP Colorimetric/Fluorometric Assay Kit (Biovision), respectively.

### **Analysis of apoptosis and mitochondrial membrane potential (MMP)**

After treatment with carboplatin (20  $\mu$ M) and metformin (2 mM), A549/R and PC9/R cells were

collected and washed with PBS for twice. Cell apoptosis and MMP of A549/R and PC9/R were measured by using the Annexin V-FITC apoptosis detection kit (Sigma Aldrich, USA) and JC-1 mitochondrial dye (Biovision) respectively according to the manufacturer's instructions.

### Tumor growth in nude mice

Four-week-old female immunodeficient nude BALB/c mice were purchased from Shanghai Super-B&K Laboratory Animal Corp., Ltd. (Shanghai, China). For xenograft, mice were injected subcutaneously into the right armpit with  $5 \times 10^6$  A549/R cells. carboplatin (5 mg/kg) and metformin (200 mg/kg) were administrated by intraperitoneal injection twice a week. Tumor size was measured every five days. Tumor volume was calculated according to the following formula: volume (V) =  $1/2 \times \text{length} \times \text{width}^2$ . The animal care and experimental protocols were approved by the Animal Care Committee of The Second Affiliated Hospital & Yuying Children's Hospital of Wenzhou Medical University.

### Statistical analysis

All the experiments were independently repeated at least 3 times. Data are represented as mean  $\pm$  SD and analyzed by using SPSS 15.0. Non-paired t test was used to estimate the statistical differences between two groups. One-way analysis of variance (ANOVA) was used to determine the differences between three or more groups. A value of  $P < 0.05$  was considered to indicate a statistically significant difference.

### ACKNOWLEDGMENTS

Thanks are due to the whole contributors who assisted with this study.

### CONFLICTS OF INTEREST

The authors declare no conflicts of interest.

### REFERENCES

1. Siegel RL, Miller KD, Jemal A. Cancer statistics, 2015. *CA Cancer J Clin.* 2015; 65:5-29.
2. DeSantis CE, Lin CC, Mariotto AB, Siegel RL, Stein KD, Kramer JL, Alteri R, Robbins AS, Jemal A. Cancer treatment and survivorship statistics, 2014. *CA Cancer J Clin.* 2014; 64:252-271.
3. Keating GM. Afatinib. A review in advanced non-small cell lung cancer. *Target Oncol.* 2016; 11:825-835.
4. Kaewbubpa W, Areepium N, Sriuranpong V. Effect of the ERCC1 (C118T) polymorphism on treatment response in advanced non-small cell lung cancer patients undergoing platinum-based chemotherapy. *Asian Pac J Cancer Prev.* 2016; 17:4917-4920.
5. Fennell DA, Summers Y, Cadranel J, Benepal T, Christoph DC, Lal R, Das M, Maxwell F, Visseren-Grul C, Ferry D. Cisplatin in the modern era: The backbone of first-line chemotherapy for non-small cell lung cancer. *Cancer Treat Rev.* 2016; 44:42-50.
6. Yang ZY, Liu L, Mao C, Wu XY, Huang YF, Hu XF, Tang JL. Chemotherapy with cetuximab versus chemotherapy alone for chemotherapy-naive advanced non-small cell lung cancer. *Cochrane Database Syst Rev.* 2014; 11:CD009948.
7. Liu J, Tang Q, Li S, Yang X. Inhibition of HAX-1 by miR-125a reverses cisplatin resistance in laryngeal cancer stem cells. *Oncotarget.* 2016; 7:86446-86456. <https://doi.org/10.18632/oncotarget.13424>.
8. Hildebrandt MA, Gu J, Wu X. Pharmacogenomics of platinum-based chemotherapy in NSCLC. *Expert Opin Drug Metab Toxicol.* 2009; 5:745-755.
9. McFarland MS, Cripps R. Diabetes mellitus and increased risk of cancer: focus on metformin and the insulin analogs. *Pharmacotherapy.* 2010; 30:1159-1178.
10. Seabloom DE, Galbraith AR, Haynes AM, Antonides JD, Wuertz BR, Miller WA, Miller KA, Steele VE, Miller MS, Clapper ML, O'Sullivan MG, Ondrey FG. Fixed-dose combinations of pioglitazone and metformin for lung cancer prevention. *Cancer Prev Res (Phila).* 2017; 10:116-123.
11. Xie W, Wang L, Sheng H, Qiu J, Zhang D, Zhang L, Yang F, Tang D, Zhang K. Metformin induces growth inhibition and cell cycle arrest by upregulating microRNA34a in renal cancer cells. *Med Sci Monit.* 2017; 23:29-37.
12. Xue C, Wang C, Sun Y, Meng Q, Liu Z, Huo X, Sun P, Sun H, Ma X, Ma X, Peng J, Liu K. Targeting P-glycoprotein function, p53 and energy metabolism: Combination of metformin and 2-deoxyglucose reverses the multidrug resistance of MCF-7/Dox cells to doxorubicin. *Oncotarget.* 2017; 8:8622-8632. <https://doi.org/10.18632/oncotarget.14373>.
13. Ling S, Song L, Fan N, Feng T, Liu L, Yang X, Wang M, Li Y, Tian Y, Zhao F, Liu Y, Huang Q, Hou Z, et al. Combination of metformin and sorafenib suppresses proliferation and induces autophagy of hepatocellular carcinoma via targeting the mTOR pathway. *Int J Oncol.* 2017; 50:297-309.
14. Li L, Han R, Xiao H, Lin C, Wang Y, Liu H, Li K, Chen H, Sun F, Yang Z, Jiang J, He Y. Metformin sensitizes EGFR-TKI-resistant human lung cancer cells *in vitro* and *in vivo* through inhibition of IL-6 signaling and EMT reversal. *Clin Cancer Res.* 2014; 20:2714-2726.
15. Li L, Wang Y, Peng T, Zhang K, Lin C, Han R, Lu C, He Y. Metformin restores crizotinib sensitivity in crizotinib-resistant human lung cancer cells through inhibition of IGF1-R signaling pathway. *Oncotarget.* 2016; 7:34442-34452. <https://doi.org/10.18632/oncotarget.9120>.

16. Martinez-Outschoorn UE, Lin Z, Ko YH, Goldberg AF, Flomenberg N, Wang C, Pavlides S, Pestell RG, Howell A, Sotgia F, Lisanti MP. Understanding the metabolic basis of drug resistance: therapeutic induction of the Warburg effect kills cancer cells. *Cell Cycle*. 2011; 10:2521–2528.
17. Sun Y, He N, Dong Y, Jiang C. MiR-24-BIM-Smac/DIABLO axis controls the sensitivity to doxorubicin treatment in osteosarcoma. *Sci Rep*. 2016; 6:34238.
18. Feng X, Jiang J, Shi S, Xie H, Zhou L, Zheng S. Knockdown of miR-25 increases the sensitivity of liver cancer stem cells to TRAIL-induced apoptosis via PTEN/PI3K/Akt/Bad signaling pathway. *Int J Oncol*. 2016; 49:2600-2610.
19. Miya T, Kobayashi K, Hino M, Ando M, Takeuchi S, Seike M, Kubota K, Gemma A, East Japan Chesters Group. Efficacy of triple antiemetic therapy (palonosetron, dexamethasone, aprepitant) for chemotherapy-induced nausea and vomiting in patients receiving carboplatin-based, moderately emetogenic chemotherapy. *Springerplus*. 2016; 5:2080.
20. Cheng YJ, Wu R, Cheng ML, Du J, Hu XW, Yu L, Zhao XK, Yao YM, Long QZ, Zhu LL, Zhu JJ, Huang NW, Liu HJ, et al. Carboplatin-induced hematotoxicity among patients with non-small cell lung cancer: Analysis on clinical adverse events and drug-gene interactions. *Oncotarget*. 2017; 8:32228-32236. <https://doi.org/10.18632/oncotarget.12951>.
21. Rossi A, Di Maio M, Chiodini P, Rudd RM, Okamoto H, Skarlos DV, Früh M, Qian W, Tamura T, Samantas E, Shibata T, Perrone F, Gallo C, et al. Carboplatin- or cisplatin-based chemotherapy in first-line treatment of small-cell lung cancer: the COCIS meta-analysis of individual patient data. *J Clin Oncol*. 2012; 30:1692-1698.
22. Sanborn RE. Cisplatin versus carboplatin in NSCLC: is there one “best” answer? *Curr Treat Options Oncol*. 2008; 9:326-342.
23. Sève P, Dumontet C. Chemoresistance in non-small cell lung cancer. *Curr Med Chem Anticancer Agents*. 2005; 5:73-88.
24. Cosaert J, Quoix E. Platinum drugs in the treatment of non-small-cell lung cancer. *Br J Cancer*. 2002; 87:825-833.
25. Stewart DJ. Mechanisms of resistance to cisplatin and carboplatin. *Crit Rev Oncol Hematol*. 2007; 63:12-31.
26. Zarogoulidis P, Petanidis S, Kioseoglou E, Domvri K, Anastakis D, Zarogoulidis K. MiR-205 and miR-218 expression is associated with carboplatin chemoresistance and regulation of apoptosis via Mcl-1 and Survivin in lung cancer cells. *Cell Signal*. 2015; 27:1576-1588.
27. Mazurek S, Boschek CB, Hugo F, Eigenbrodt E. Pyruvate kinase type M2 and its role in tumor growth and spreading. *Semin Cancer Biol*. 2005; 15:300-308.
28. Altenberg B, Greulich KO. Genes of glycolysis are ubiquitously overexpressed in 24 cancer classes. *Genomics*. 2004; 84:1014-1020.
29. Ginés A, Bystrup S, Ruiz de Porras V, Guardia C, Musulén E, Martínez-Cardús A, Manzano JL, Layos L, Abad A, Martínez-Balibrea E. PKM2 subcellular localization is involved in oxaliplatin resistance acquisition in ht29 human colorectal cancer cell lines. *PLoS One*. 2015; 10:e0123830.
30. Pan C, Wang X, Shi K, Zheng Y, Li J, Chen Y, Jin L, Pan Z. MiR-122 Reverses the Doxorubicin-Resistance in Hepatocellular Carcinoma Cells through Regulating the Tumor Metabolism. *PLoS One*. 2016; 11:e0152090.
31. Warburg O. On the origin of cancer cells. *Science*. 1956; 123:309-314.
32. Kroemer G, Pouyssegur J. Tumor cell metabolism: cancer’s Achilles’ heel. *Cancer Cell*. 2008; 13:472-482.
33. Heiden MG, Cantley LC, Thompson CB. Understanding the warburg effect: the metabolic requirements of cell proliferation. *Science*. 2009; 324:1029–1033.
34. Kabanov AV, Batrakova EV, Alakhov VY. An essential relationship between ATP depletion and chemosensitizing activity of Pluronic block copolymers. *Journal of Controlled Release*. 2003; 91:75–83.
35. Zhou Y, Tozzi F, Chen J, Fan F, Xia L, Wang J, Gao G, Zhang A, Xia X, Brasher H, Widger W, Ellis LM, Weihua Z. Intracellular ATP levels are a pivotal determinant of chemoresistance in colon cancer cells. *Cancer Res*. 2012; 72:304-314.
36. Wen S, Zhu D, Huang P. Targeting cancer cell mitochondria as a therapeutic approach. *Future Med Chem*. 2013; 5:53-67.
37. El-Mir MY, Nogueira V, Fontaine E, Averet N, Rigoulet M, Leverve X. Dimethylbiguanide inhibits cell respiration via an indirect effect targeted on the respiratory chain complex I. *J Biol Chem*. 2000; 275:223–228.
38. Silvestri A, Palumbo F, Rasi I, Posca D, Pavlidou T, Paoluzi S, Castagnoli L, Cesareni G. Metformin Induces Apoptosis and Downregulates Pyruvate Kinase M2 in Breast Cancer Cells Only When Grown in NutrientPoor Conditions. *Plos One*. 2015; 10:390-392.
39. Baron B, Wang Y, Maehara S, Maehara Y, Kuramitsu Y, Nakamura K. Resistance to gemcitabine in the pancreatic cancer cell line KLM1-R reversed by metformin action. *Anticancer Res*. 2015; 35:1941-1949.
40. Teixeira SF, Guimarães Idos S, Madeira KP, Daltoé RD, Silva IV, Rangel LB. Metformin synergistically enhances antiproliferative effects of cisplatin and etoposide in NCI-H460 human lung cancer cells. *J Bras Pneumol*. 2013; 39:644-649.
41. Bikas A, Jensen K, Patel A, Costello J Jr, McDaniel D, Klubo-Gwiedzinska J, Larin O, Hoperia V, Burman KD, Boyle L, Wartofsky L, Vasko V. Glucose-deprivation increases thyroid cancer cells sensitivity to metformin. *Endocr Relat Cancer*. 2015; 22:919-932.
